# Supplementary material for: Telomere-to-telomere gap-free genome assembly and chromosome segment substitution lines facilitated gene identification in wild rice
Source: Research Square preprint supplement (doi:10.21203/rs.3.rs-2587158/v1), 2023-02-20
Supplement: Supplementary file 1 [file Supplementary Table 1-28.xlsx]

## Sheet: Table S1
Supplemental Table 1. Summary of the sequence data for Y476
	Raw data (bp)	Number of subreads	Mean subread length (bp)	Depth (X)	Tissue
HiFi	29688336424	1875461	15829	70.5
Nanopore	16703394310	163201	102348	40
Illumina	26224111800	174827412	150	62.2
HiC	68900773800	459338492	150	164
RNA-seq	8208116100	54720774	150	\	leaf
RNA-seq	9136626000	60910840	150	\	root
RNA-seq	8492896500	56619310	150	\	stem
RNA-seq	8606405100	57376034	150	\	leaf
RNA-seq	7877219100	52514794	150	\	stem
RNA-seq	9249345000	61662300	150	\	young panicle
BioNano	972034161542	4361201	223000	2308

## Sheet: Table S2
Supplemental Table 2. Statistics of repeat content in Y476
Genome name	Y476
Chromosome number	12
Total length	421,142,180 bp
GC percentage	0.4419
bases masked	249,340,429 bp (59.21%)
	Number of elements	Length occupied(bp)	Percentage of sequence (100%)
Class I: Retroelements	84084	128741907	0.3057
SINEs	9896	1547973	0.0037
LINEs	17200	5822434	0.0138
LTR elements：	56988	121371500	0.2882
Ty1/Copia	9950	13421026	0.0319
Gypsy/DIRS1	40863	106170186	0.2521
Class II: DNA Transposon	410086	92533427	0.2197
Unclassified	59038	12707347	0.0302

## Sheet: Table S3
Supplemental Table 3. Statistics of the predicted protein-coding genes.
	Gene set	Number	Average CDS length (bp)	Average exons per gene
De novo	Augustus	25723	1355.5	4.95
	GlimmerHMM	189440	639.9	2.42
	Braker2	38292	1130	4.91
Homolog	Araport11	14282	\	\
	MSU	36389	\	\
	IRGSP	28560	\	\
	R498	54118	\	\
	MH63RS3	41033	\	\
	ZS97RS3	41822	\	\
RNA_seq	Transdecoder	27019	1134.5	13.8
EVM		38055	1168.6	4.42
BUSCO assesment	0.98

## Sheet: Table S4
Supplemental Table 4. Statistics of gene annotation of Y476 genome
Genes annotation statistics	number
Number of genes	38055
Mean gene length	2726
Mean CDS length	1168
Mean exons per gene	4.42

## Sheet: Table S5
Supplemental Table 5. Non coding RNA annotation results
Class	Number	Average length (bp)	Total length (bp)
rRNA	465	531	247161
miRNA	1171	181	212864
tRNA	772	75	57970
snRNA	88	151	13344
snoRNA	624	109	68474

## Sheet: Table S6
Supplemental Table 6. BUSCOs analysis of Y476 genome completeness
Description	Number	Percentage (100%)
Complete BUSCOs(C)	1595	0.988228
Complete and single-copy BUSCOs (S)	1558	0.965304
Complete and duplicated BUSCOs (D)	37	0.0229244
Fragmented BUSCOs (F)	4	0.00247831
Missing BUSCOs (M)	15	0.00929368
Total BUSCO groups searched	1614	1

## Sheet: Table S7
Supplemental Table 7. Protein BUSCOs analysis of Y476 predicted genes
Description	Number	Percentage(100%)
Complete BUSCOs(C)	1581	0.979554
Complete and single-copy BUSCOs (S)	1552	0.961586
Complete and duplicated BUSCOs (D)	29	0.0179678
Fragmented BUSCOs (F)	11	0.00681537
Missing BUSCOs (M)	22	0.013
Total BUSCO groups searched	1614	1

## Sheet: Table S8
Supplemental Table 8. Functional annotation of the predicted genes
Database	Gene number	Percent (100%)
Total	38055
NR	32533	0.854894
GO	11386	0.299199
Interproscan	35261	0.92658
Swissprot	24467	0.642938
KEGG	12820	0.336881
Unannotated	1988	0.0522402

## Sheet: Table S9
Supplemental Table 9. Statistics of centromeric regions in Y476 genomes
Assemblies	Chr	CentO sequence location		Total no. of units	Total length (bp)
		Start	End
Y476	Chr01	27185713	28651302	520	1465589
	Chr02	14108898	14202975	472	94077
	Chr03	21951797	22402394	314	450597
	Chr04	10989322	11155373	306	166051
	Chr05	19290158	19372362	493	82204
	Chr06	16122530	16205311	63	82781
	Chr07	13479887	14127935	40	648048
	Chr08	18097484	18990691	376	893207
	Chr09	4683446	5105389	162	421943
	Chr10	17172250	18278689	2196	1106439
	Chr11	13807538	14131703	1284	324165
	Chr12	16780823	17613667	1263	832844

## Sheet: Table S10
Supplemental Table 10. General statistics of the telomeres for Y476 genome
Chromosome	Left Start	Left End	Left length	Right Start	Right End	Right length
Chr01	1	12113	12113	46316094	46327024	10930
Chr02	1	6543	6543	38807666	38811049	3383
Chr03	1	8716	8716	40787889	40795524	7635
Chr04	1	7787	7787	\	\	\
Chr05	1	5929	5929	\	\	\
Chr06	1	593	593	34143956	34150751	6795
Chr07	1	6297	6297	32678436	32683361	4925
Chr08	1	6105	6105	33183376	33191451	8075
Chr09	\	\	\	28164700	28169411	4711
Chr10	1	4877	4877	\	\	\
Chr11	\	\	\	\	\	\
Chr12	1	5800	5800	29987911	29995173	7262

[truncated: 18 more sheets: Table S11, Table S12, Table S13, Table S14, Table S15, Table  S16, Table S17, Table S18, Table S19, Table S20, Table S21, Table S22, Table S23, Table S24, Table S25, Table S26, Table S27, Table S28]
